# Supplementary material for: Crystallization induces thermally activated delayed fluorescence of Ag14 nanoclusters
Source: Royal Society of Chemistry journal article supplement (doi:10.1039/d4qi02920h), 2025-01-01
Supplement: d4qi02920h1.pdf [file d4qi02920h1.pdf]

# Crystallization induces thermally activated delayed fluorescence of Ag<sub>14</sub> nanocluster†

Jin-Sen Yang,<sup>a</sup> Lu-Yao Xiao,<sup>b</sup> Fan Liu,<sup>b</sup> Jun Xu,<sup>a</sup> Xi-Yan Dong,<sup>\*ab</sup> Jia-Hua Hu,<sup>\*b</sup> Jing Li<sup>\*c</sup> and Shuang-Quan Zang<sup>b</sup>

<sup>a.</sup> College of Chemistry and Chemical Engineering, Henan Polytechnic University, 454000 Jiaozuo (China)

<sup>b.</sup> College of Chemistry, Zhengzhou University, 450001 Zhengzhou (China)

<sup>c.</sup> School of Science, Xuchang University, 461000, Xuchang, (China)

## Contents

|                                                                                                                                                                                                                                                                                      |   |
|--------------------------------------------------------------------------------------------------------------------------------------------------------------------------------------------------------------------------------------------------------------------------------------|---|
| <b>Materials and reagents</b> .....                                                                                                                                                                                                                                                  | 2 |
| <b>The synthesis of Ag<sub>14</sub>-dcbdt</b> .....                                                                                                                                                                                                                                  | 3 |
| <b>Instrumentation and characterization</b> .....                                                                                                                                                                                                                                    | 3 |
| <b>X-ray Crystallography</b> .....                                                                                                                                                                                                                                                   | 3 |
| <b>Transient absorption (TA) measurement</b> .....                                                                                                                                                                                                                                   | 3 |
| <b>Density functional theory (DFT) calculations</b> .....                                                                                                                                                                                                                            | 4 |
| <b>Figure S1.</b> Selected representations of frontier occupied molecular orbitals for Ag <sub>14</sub> -dcbdt (isovalue = 0.02). .....                                                                                                                                              | 5 |
| <b>Figure S2.</b> Selected representations of frontier unoccupied molecular orbitals for Ag <sub>14</sub> -dcbdt (isovalue = 0.02). .....                                                                                                                                            | 5 |
| <b>Figure S3.</b> Negative-ion ESI-MS of Ag <sub>14</sub> -dcbdt in CH <sub>2</sub> Cl <sub>2</sub> . .....                                                                                                                                                                          | 6 |
| <b>Figure S4.</b> FT-IR spectra of Ag <sub>14</sub> -dcbdt, dcbdt and TPP ligands. ....                                                                                                                                                                                              | 6 |
| <b>Figure S5.</b> (a) The survey scans XPS profiles of Ag <sub>14</sub> -dcbdt. (b) High resolution XPS for Ag 3p of Ag <sub>14</sub> -dcbdt. ....                                                                                                                                   | 7 |
| <b>Figure S6.</b> The experimental and simulated PXRD patterns of Ag <sub>14</sub> -dcbdt. ....                                                                                                                                                                                      | 7 |
| <b>Figure 7.</b> (a) The optical absorption spectrum of Ag <sub>14</sub> -dcbdt. Inset: A photo of Ag <sub>14</sub> -dcbdt in CH <sub>2</sub> Cl <sub>2</sub> . (b) The optical bandgap of Ag <sub>14</sub> -dcbdt in CH <sub>2</sub> Cl <sub>2</sub> . ....                         | 8 |
| <b>Figure 8.</b> PL properties of Ag <sub>14</sub> -dcbdt in DMF at 200 K. (a) PL emission spectra. (b) PL decay spectrum excited by a 370 nm nanosecond laser. (c) PL decay spectrum at 696 nm excited by a 355 nm microsecond laser. (d) PL spectra on different time scales. .... | 8 |
| <b>Figure S9.</b> (a) The UV-visible diffuse reflectance spectrum of Ag <sub>14</sub> -dcbdt PMMA film. (b) The optical bandgap of Ag <sub>14</sub> -dcbdt PMMA film. ....                                                                                                           | 9 |
| <b>Figure S10.</b> PL decay spectra at 665 nm of Ag <sub>14</sub> -dcbdt PMMA film under ambient and vacuum                                                                                                                                                                          |   |

|                                                                                                                                                                                                                                   |    |
|-----------------------------------------------------------------------------------------------------------------------------------------------------------------------------------------------------------------------------------|----|
| conditions (Excited by a 355 nm microsecond laser). .....                                                                                                                                                                         | 9  |
| <b>Figure S11.</b> PL decay spectrum of Ag <sub>14</sub> -dcbdt PMMA film at 665 nm (Excited by a 370 nm nanosecond laser). .....                                                                                                 | 10 |
| <b>Figure S12.</b> (a) The UV-visible diffuse reflectance spectrum of crystalline Ag <sub>14</sub> -dcbdt. (b) The optical bandgap of crystalline Ag <sub>14</sub> -dcbdt. ....                                                   | 10 |
| <b>Figure S13.</b> Excitation and emission spectra of Ag <sub>14</sub> -dcbdt crystals. ....                                                                                                                                      | 11 |
| <b>Figure S14.</b> PL decay spectrum at 665 nm of Ag <sub>14</sub> -dcbdt crystals (Excited by a 370 nm nanosecond laser). ....                                                                                                   | 11 |
| <b>Figure S15.</b> PL decay spectra at 665 nm of Ag <sub>14</sub> -dcbdt crystals under ambient and vacuum conditions (Excited by a 355 nm microsecond laser). ....                                                               | 12 |
| <b>Figure S16.</b> The emission intensity and position of temperature-dependent Ag <sub>14</sub> -dcbdt crystals in the range of 83 to 283 K. ....                                                                                | 12 |
| <b>Figure S17.</b> PL spectra of crystalline samples of Ag <sub>14</sub> -dcbdt at 83 K on different time scales. ....                                                                                                            | 13 |
| <b>Figure S18.</b> Evolution-associated spectra (EAS) of Ag <sub>14</sub> -dcbdt in (b) CH <sub>2</sub> Cl <sub>2</sub> and (d) the crystalline state were obtained through global fitting of the transient absorption data. .... | 14 |
| <b>Figure S19.</b> PL decay curves of crystalline samples of Ag <sub>14</sub> -dcbdt. ....                                                                                                                                        | 15 |
| <b>Figure S20</b> Simulated the energy gap between the S1 and T1states in the dichloromethane solution (a) and gas phase (b). ....                                                                                                | 16 |
| <b>Figure S21.</b> Comparisons of excitation monitoring at 665 nm and absorption/reflectance spectra for Ag <sub>14</sub> -dcbdt in CH <sub>2</sub> Cl <sub>2</sub> , PMMA film and in crystalline state. ....                    | 17 |
| <b>Figure S22.</b> Arrangement of Ag <sub>14</sub> -dcbdt NCs along the (010) crystal plane and the inter-cluster C – H···N≡C interactions (red dashed line). ....                                                                | 18 |
| <b>Table S2.</b> Transition energy, oscillator strength, and orbital contributions of the strongest electronic excitations of Ag <sub>14</sub> -dcbdt. ....                                                                       | 19 |
| <b>Table S3.</b> The first singlet and triplet excited energies of the Ag <sub>14</sub> -dcbdt cluster in solution and gas state. ....                                                                                            | 20 |
| <b>Supplementary References</b> .....                                                                                                                                                                                             | 20 |

## Materials and reagents

4,5-dicyanobenzene-1,2-dithiolate (dcbdt) was synthesized following a literature method.<sup>1</sup> All other chemicals and solvents used were of commercially available reagent grade and were used without further purification. All solvents were of analytical grade reagent.

### **The synthesis of Ag<sub>14</sub>-dcbdt**

Silver trifluoroacetate (11 mg, 0.05 mM), tri-*p*-tolylphosphane (18 mg, 0.06 mM), dcbdt (4 mg, 0.02 mM) and tetraoctylammonium nitrate (11 mg, 0.02 mM) was dissolved in a mixed solution of dichloromethane (3 mL) and acetonitrile (3 mL), then 1 mL of ethanol containing 2 mg (0.02 mM) borane tert-butylamine complex was added. After being stirred for approximately 10 min at room temperature, the orange-red solution was kept in the dark for 1 day to yield red rhombic crystals. Yields: 35% based on the dcbdt ligand.

### **Instrumentation and characterization**

X-ray photoelectron spectroscopy (XPS) was measured on Thermo Scientific ESCALAB 250Xi spectrometer equipped with a 300 W aluminum target radiation source (Al K $\alpha$ ). Powder X-ray diffraction patterns (PXRD) were collected on a Rigaku MiniFlex 600 diffractometer with CuK $\alpha$  radiation ( $\lambda = 1.5418 \text{ \AA}$ ) at 30 kV. UV-vis-NIR absorption spectra were recorded using a Hitachi UH4150 UV-Visible spectrophotometer in the range 300-1500 nm. UV-visible diffuse reflectance spectra of samples were recorded in the range of 250-700 nm using a UH4150 spectrophotometer equipped with an integrating sphere. Steady- and transient-state photoluminescence (PL) spectra were recorded with a HORIBA FluoroLog-3 fluorescence spectrometer. Fourier transform infrared (FT-IR) spectra were recorded on a Bruker ALPHA II spectrometer. Full-time domain fluorescence lifetime data acquisition using M-X355L picosecond laser in combination with FF4 fluorescence lifetime decoder (Orient KOJI Ltd, Tianjin CHN), The detector use PPD850 photon counting detector (TTS 180ps, Horiba JobinYvon IBH, UK).

### **X-ray Crystallography**

Single-crystal X-ray diffraction measurements of Ag<sub>14</sub>-dcbdt, were performed on a Rigaku XtaLAB Pro diffractometer with Cu-K $\alpha$  radiation ( $\lambda = 1.54178 \text{ \AA}$ ) at 200 K, respectively. Data collection and reduction were performed using the program CrysAlisPro<sup>2</sup>. The two structures were all solved with direct methods (SHELXS)<sup>3</sup> and refined using full-matrix least-squares based on  $F^2$  with the programs SHELXS-97 and SHELXL-97 within OLEX2.<sup>4-5</sup> All the atoms were refined anisotropically with the exception of some solvent molecules and hydrogen atoms were placed in calculated positions refined using idealized geometries and assigned fixed isotropic displacement parameters. Structure refinement was operated with different restraints and constraints (ISOR, SIMU, DFIX) in the corresponding crystallographic CIF files. The SQUEEZE routine in the PLATON software was applied to subtract the diffraction contribution from the disordered solvent molecules in the structures. The detailed information of the crystal data, data collection and refinement results for all complexes are summarized in Tables S1.

### **Transient absorption (TA) measurement**

The transient absorption spectra were recorded on a commercial pump-probe system with microscope (Helios-EOS, Ultrafast Systems LLC) in combination with a femtosecond laser system (Astrella, Coherent). Laser pulses (800 nm center wavelength, 100 fs duration, 1 kHz repetition rate, 7 mJ/pulse) were generated by a Ti:Sapphire-based regenerative amplified laser system. The laser pulses were split to generate pump and probe beam. The pump pulses at 300 nm were delivered by an optical parametric amplifier which was excited by a portion of 800 nm laser pulses. For femtosecond transient absorptions in CH<sub>2</sub>Cl<sub>2</sub> solution, the pump pulse energy was 50  $\mu\text{J}/\text{cm}^2$  at the sample cell. The probe and reference beams were generated by focusing the 800 nm beam (split from the amplifier with a tiny portion) to a sapphire crystal. The pump-probe delay was controlled by an optical delay line. The pump-probe delay time was electronically controlled. TA signal was obtained by detecting the intensity of probe and reference pulses with and without pumped light, and global analysis was performed by Glotaran software.

Femtosecond transient absorptions of Ag<sub>14</sub>-dcbdt crystal are measured by the single crystal microimaging detection system, and the specific position of a single crystal is measured by a long working distance 50 $\times$  objective lens. The camera provides a direct enlarged view of the sample. The probe beam was generated by focusing the 800 nm beam to another sapphire crystal. The pump pulse at 400 nm with an energy of 450  $\mu\text{J}/\text{cm}^2$ . The pump-probe delay also was controlled by the same optical delay line. TA signal is obtained by detecting the intensity of probe light with and without pumped light, and global analysis is performed by Glotaran software.

### **Density functional theory (DFT) calculations**

The density functional theory (DFT) and time-dependent density functional theory (TD-DFT) calculation were performed with Gaussian 16<sup>6</sup> under Perdew-Burke-Ernzerhof (PBE0) functional.<sup>7</sup> All calculations were performed using 6-31g\* basis set for H, C, N, P and S atoms,<sup>8-9</sup> and Lanl2DZ effective core potentials for Ag atom.<sup>10-12</sup> The solvation effects were incorporated into the quantum mechanical calculations using the Conductor-like Polarizable Continuum Model (CPCM) with dichloromethane as the solvent. The self-consistent reaction field (SCRF) method was employed to account for the solvent environment during the optimization and electronic property calculations. The theoretical UV-Vis spectra were calculated using TD-DFT and plotted based on the computation of the lowest 200 singlet-to-singlet excitation energies.

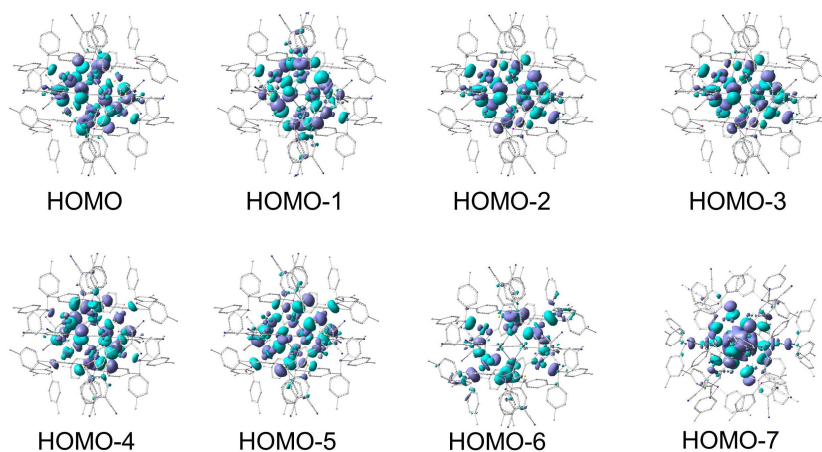

**Figure S1.** Selected representations of frontier occupied molecular orbitals for  $\text{Ag}_{14}\text{-dcbdt}$  (isovalue = 0.02).

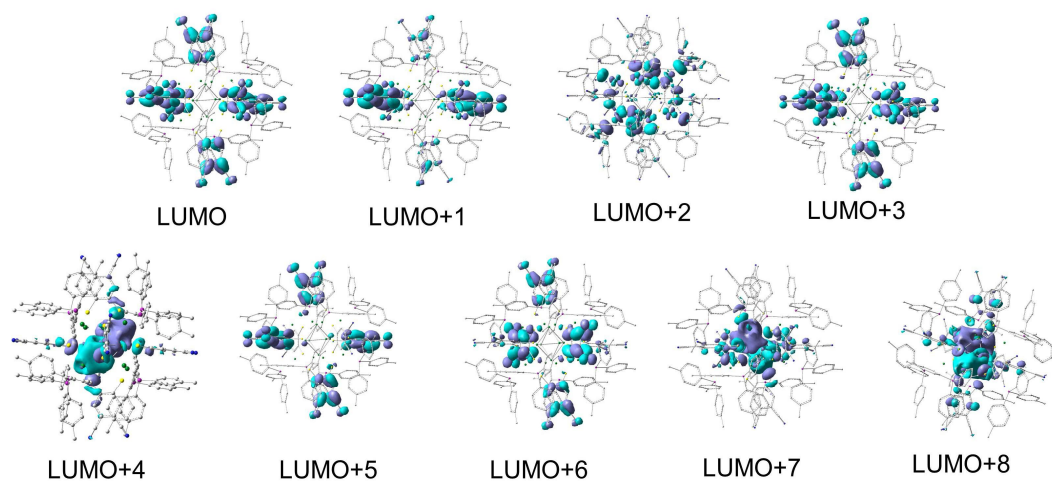

**Figure S2.** Selected representations of frontier unoccupied molecular orbitals for  $\text{Ag}_{14}\text{-dcbdt}$  (isovalue = 0.02).

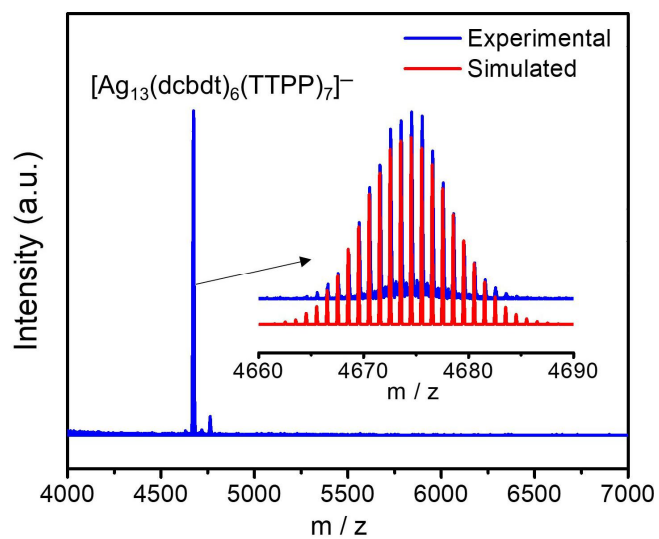

**Figure S3.** Negative-ion ESI-MS of  $\text{Ag}_{14}$ -dcbdt in  $\text{CH}_2\text{Cl}_2$ .

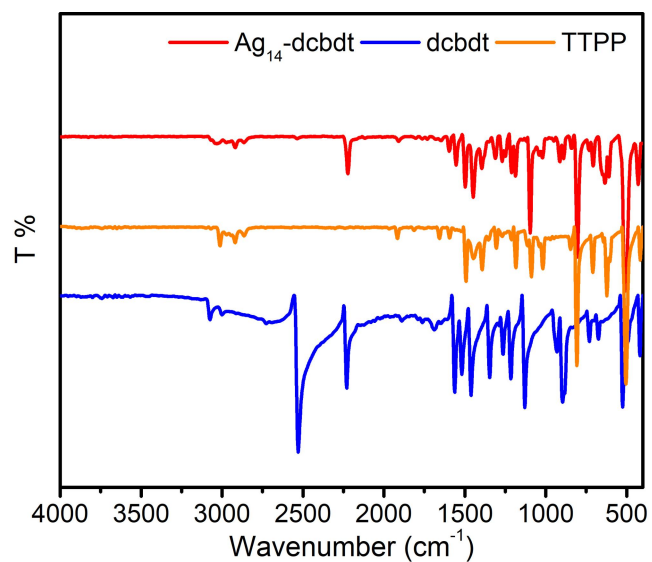

**Figure S4.** FT-IR spectra of  $\text{Ag}_{14}$ -dcbdt, dcbdt and TTPP ligands.

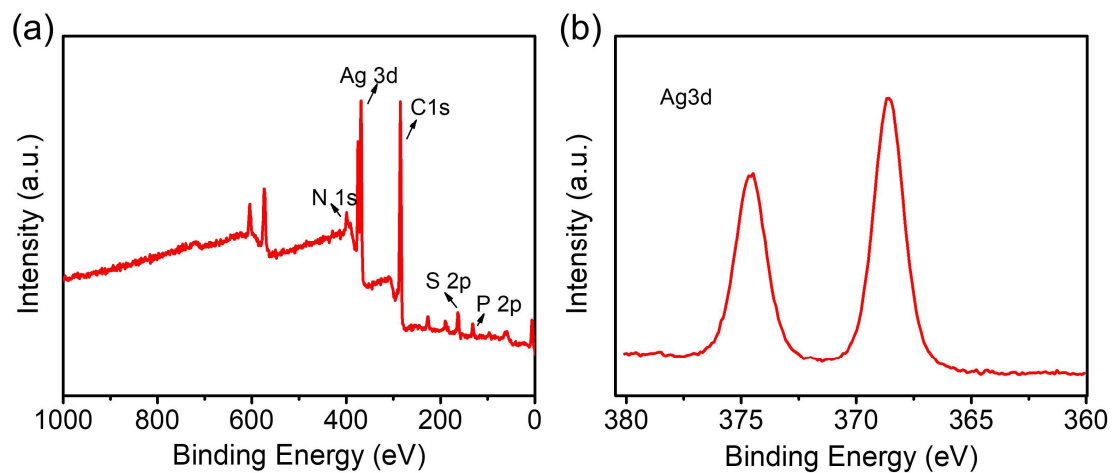

**Figure S5.** (a) The survey scans XPS profiles of Ag<sub>14</sub>-dcbdt. (b) High resolution XPS for Ag 3p of Ag<sub>14</sub>-dcbdt.

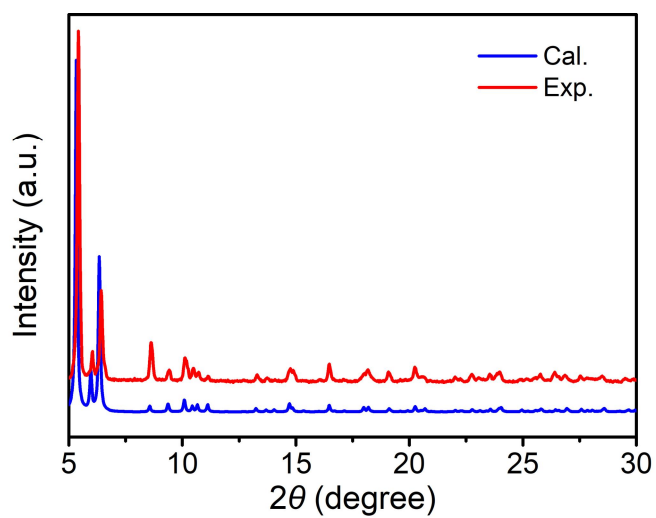

**Figure S6.** The experimental and simulated PXR D patterns of Ag<sub>14</sub>-dcbdt.

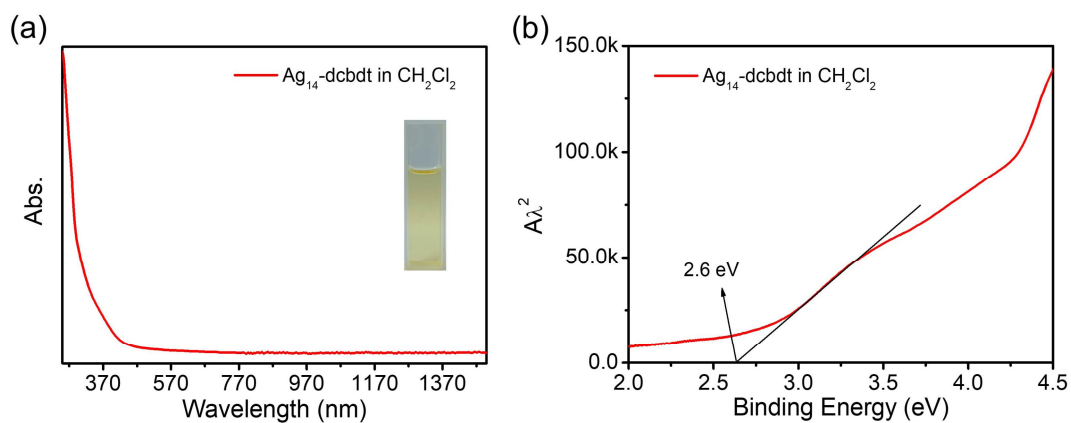

**Figure 7.** (a) The optical absorption spectrum of  $\text{Ag}_{14}\text{-dcbdt}$ . Inset: A photo of  $\text{Ag}_{14}\text{-dcbdt}$  in  $\text{CH}_2\text{Cl}_2$ . (b) The optical bandgap of  $\text{Ag}_{14}\text{-dcbdt}$  in  $\text{CH}_2\text{Cl}_2$ .

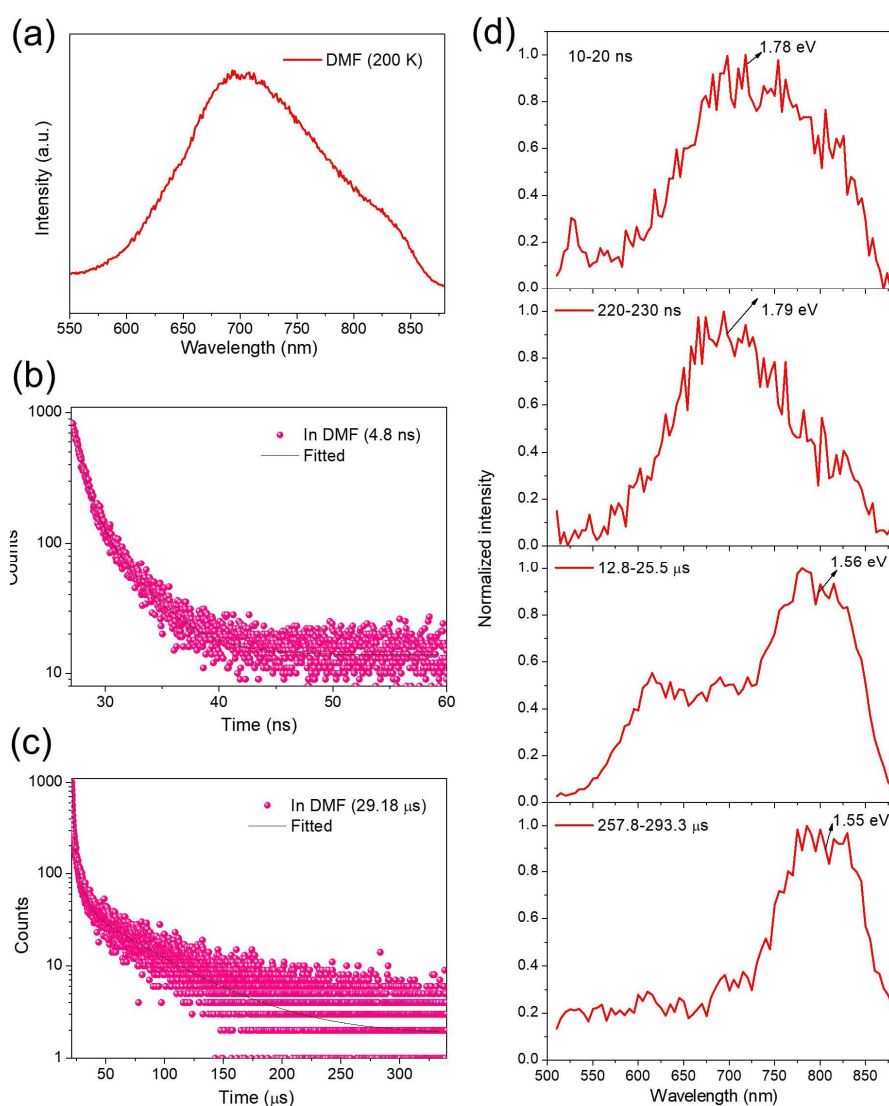

**Figure 8.** PL properties of  $\text{Ag}_{14}\text{-dcbdt}$  in DMF at 200 K. (a) PL emission spectra. (b) PL decay spectrum excited by a 370 nm nanosecond laser. (c) PL decay spectrum at 696 nm excited by a 355 nm microsecond laser. (d) PL spectra on different time scales.



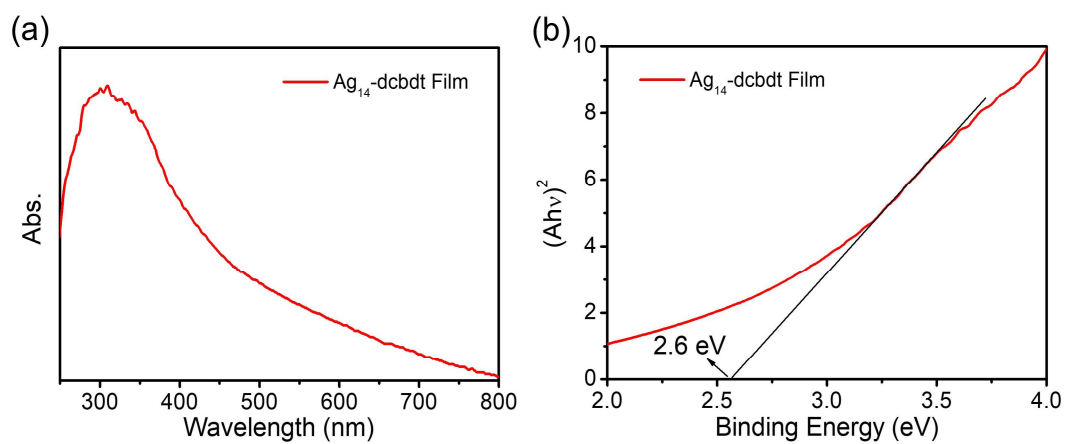

**Figure S9.** (a) The UV-visible diffuse reflectance spectrum of Ag<sub>14</sub>-dcbdt PMMA film. (b) The optical bandgap of Ag<sub>14</sub>-dcbdt PMMA film.

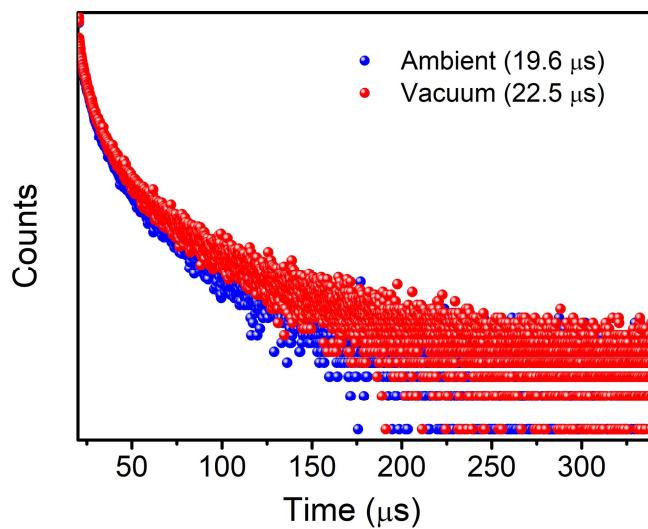

**Figure S10.** PL decay spectra at 665 nm of Ag<sub>14</sub>-dcbdt PMMA film under ambient and vacuum conditions (Excited by a 355 nm microsecond laser).

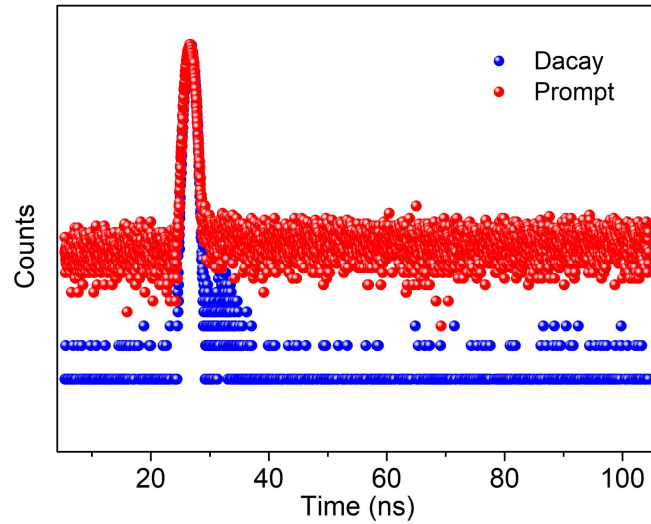

**Figure S11.** PL decay spectrum of  $\text{Ag}_{14}$ -dcbdt PMMA film at 665 nm (Excited by a 370 nm nanosecond laser).

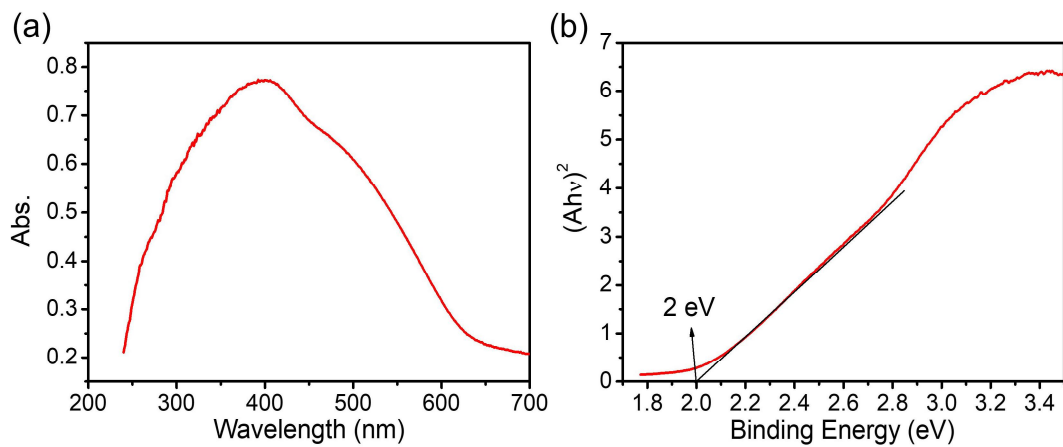

**Figure S12.** (a) The UV-visible diffuse reflectance spectrum of crystalline  $\text{Ag}_{14}$ -dcbdt. (b) The optical bandgap of crystalline  $\text{Ag}_{14}$ -dcbdt.

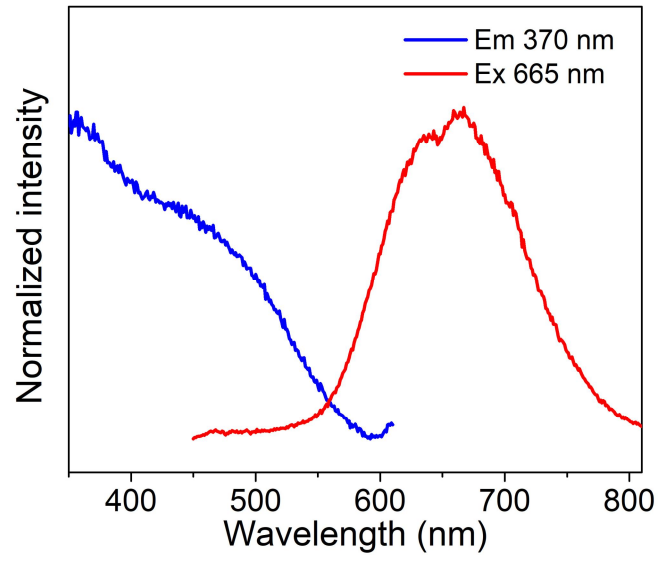

**Figure S13.** Excitation and emission spectra of  $\text{Ag}_{14}$ -dcbdt crystals.

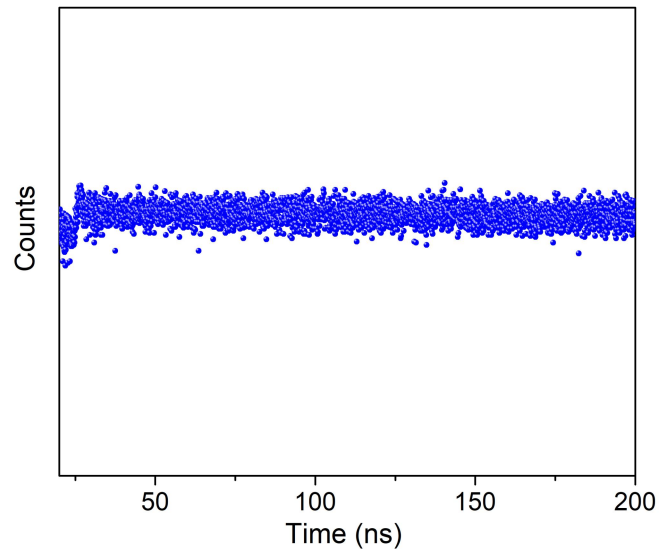

**Figure S14.** PL decay spectrum at 665 nm of  $\text{Ag}_{14}$ -dcbdt crystals (Excited by a 370 nm nanosecond laser).

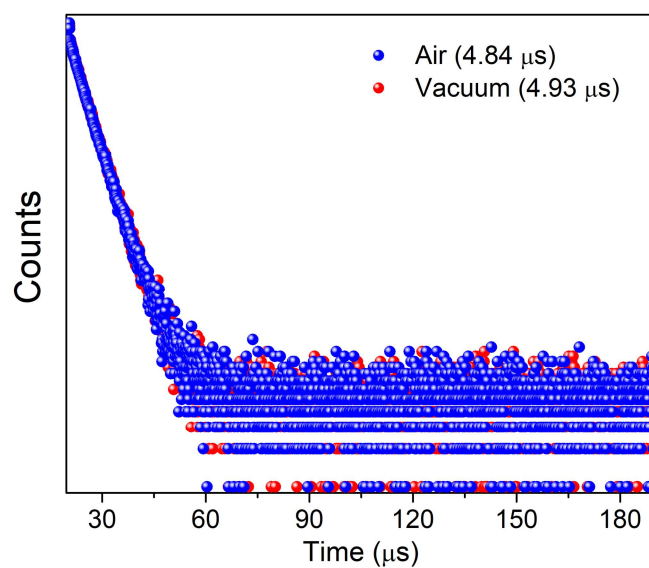

**Figure S15.** PL decay spectra at 665 nm of Ag<sub>14</sub>-dcbdt crystals under ambient and vacuum conditions (Excited by a 355 nm microsecond laser).

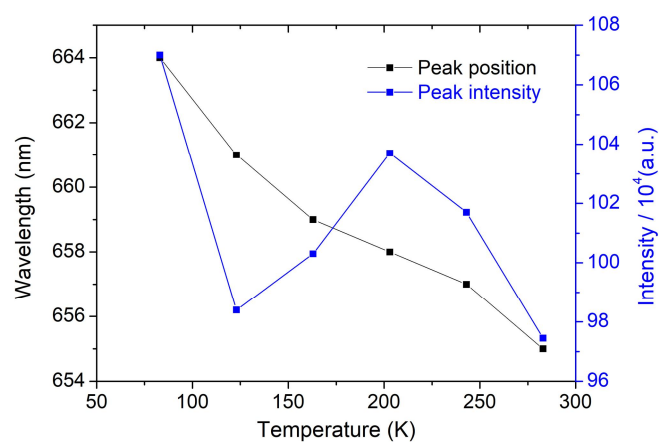

**Figure S16.** The emission intensity and position of temperature-dependent Ag<sub>14</sub>-dcbdt crystals in the range of 83 to 283 K.

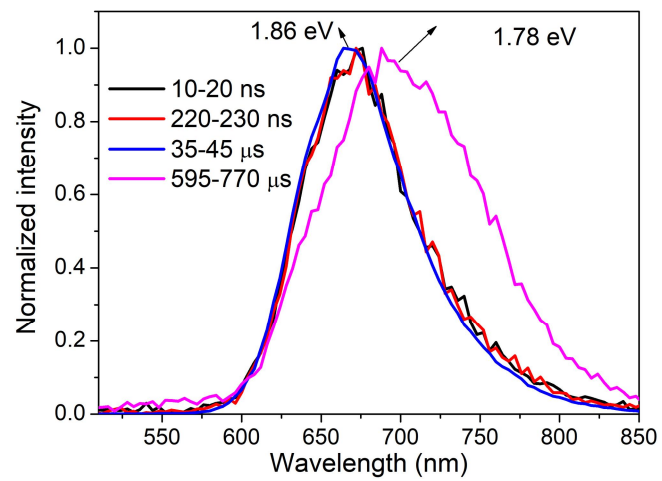

**Figure S17.** PL spectra of crystalline samples of  $\text{Ag}_{14}\text{-dcbdt}$  at 83 K on different time scales.

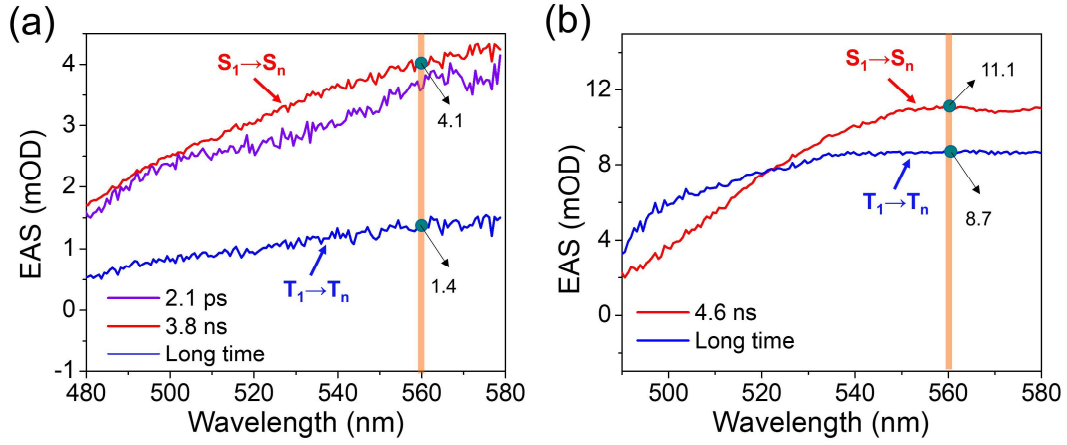

**Figure S18.** Evolution-associated spectra (EAS) of Ag<sub>14</sub>-dcbdt in (b) CH<sub>2</sub>Cl<sub>2</sub> and (d) the crystalline state were obtained through global fitting of the transient absorption data.

The ratio of ISC ( $k_{ISC}^{crystal}/k_{ISC}^{solution}$ ) can be roughly estimated through the following equation:

$$I(S_1 \rightarrow S_n) = N(S_1) \cdot \sigma_S(S_1 \rightarrow S_n) \quad (1)$$

$$I(T_1 \rightarrow T_n) = N(T_1) \cdot \sigma_T(T_1 \rightarrow T_n) \quad (2)$$

$$\eta_{ISC} = \frac{N(T_1)}{N(S_1)} = \frac{k_{ISC}}{k_{ISC} + k_{Fl} + k_{nr}} \quad (3)$$

$$k_{ISC} + k_{Fl} + k_{nr} = \frac{1}{\tau(S_1)} \quad (4)$$

In which,  $I$  represents excited state absorption intensity,  $\sigma$  is excited state absorption cross section,  $N$  is the number of excitons.  $k_{ISC}$ ,  $k_{Fl}$  and  $k_{nr}$  are the rate of intersystem crossing (ISC), prompt fluorescence (Fl) and non-radiative transition,  $\eta_{ISC}$  is the efficiency of ISC.  $\tau(S_1)$  is the decay time of singlet excitons. In this work,  $I$  is the intensity at 560 nm. The  $\tau(S_1)$  of Ag<sub>14</sub>-dcbdt in CH<sub>2</sub>Cl<sub>2</sub> and crystalline state are 3.8 ns and 4.6 ns respectively. Assuming that the ratio of  $\sigma_S/\sigma_T$  does not change with the physical form of the Ag<sub>14</sub>-dcbdt, the ratio of ISC ( $k_{ISC}^{crystal}/k_{ISC}^{solution}$ ) was estimated to be 1.9.

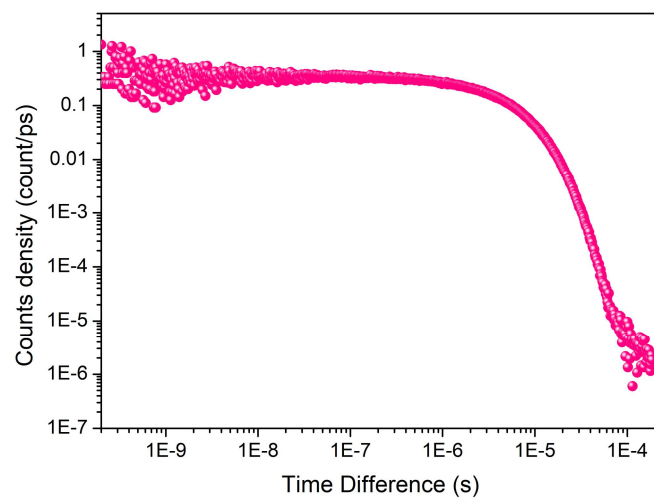

**Figure S19.** PL decay curves of crystalline samples of Ag<sub>14</sub>-dcbdt.

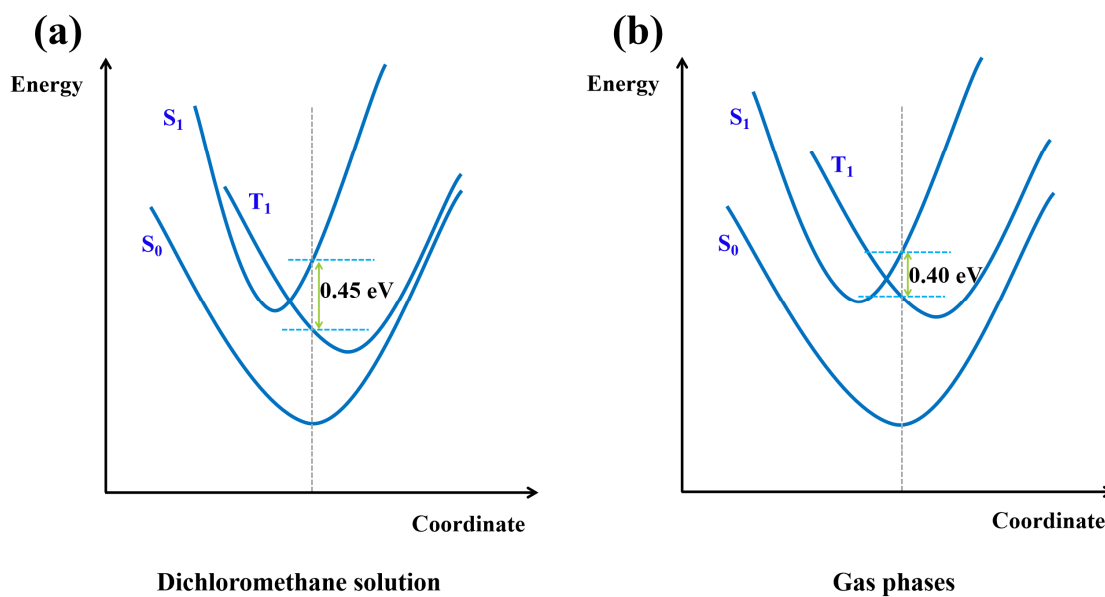

**Figure S20** Simulated the energy gap between the S<sub>1</sub> and T<sub>1</sub> states in the dichloromethane solution (a) and gas phase (b).

To qualitatively evaluate the effect of the difference in excited-state energies between solvent and gas phases, we have calculated the ground-state geometry of the molecule in the gas phase. Based on this structure, we simulated the energy gap between the S<sub>1</sub> and T<sub>1</sub> states. As shown in Fig S20 and Table S3, our results show that the energy gap in the gas phase (0.40 eV) is smaller than that in the dichloromethane solution (0.45 eV). This calculated result is consistent with the experimental trend.



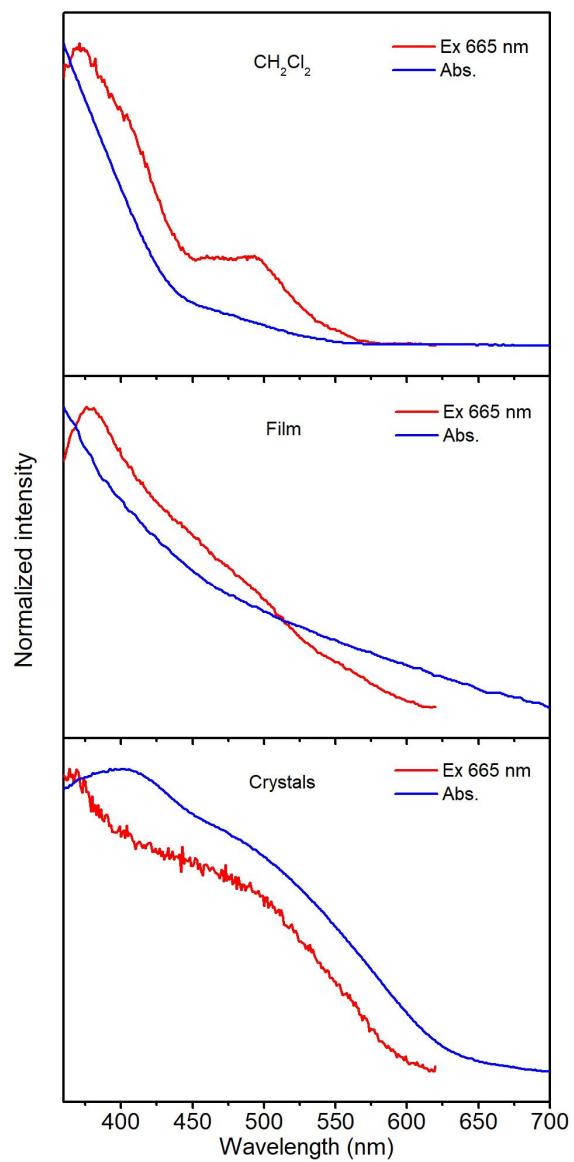

**Figure S21.** Comparisons of excitation monitoring at 665 nm and absorption/reflectance spectra for Ag<sub>14</sub>-dcbdt in CH<sub>2</sub>Cl<sub>2</sub>, PMMA film and in crystalline state.

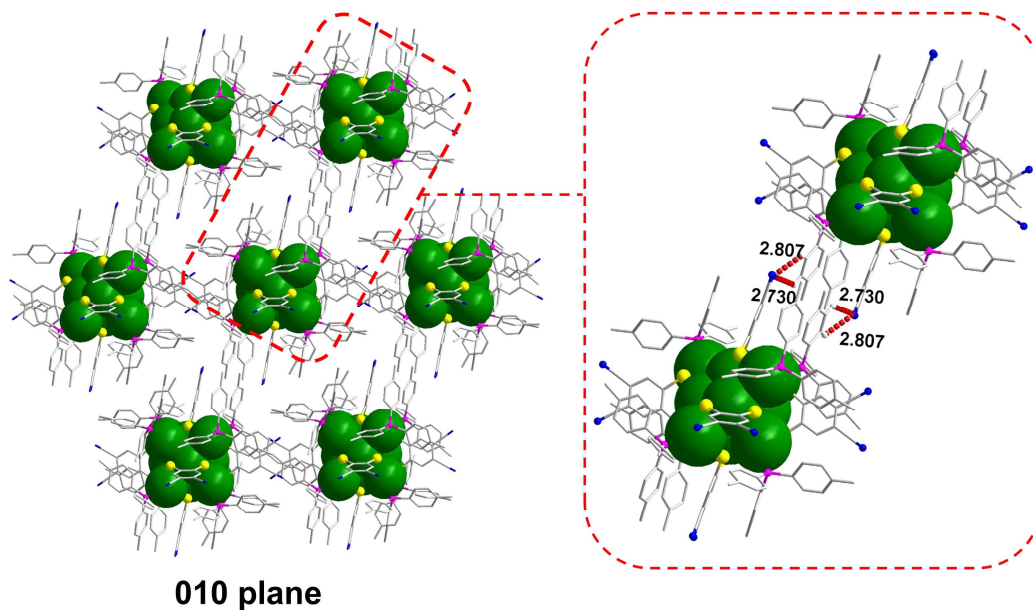

**010 plane**

**Figure S22.** Arrangement of  $\text{Ag}_{14}$ -dcbdt NCs along the (010) crystal plane and the inter-cluster  $\text{C}\cdots\text{N}\equiv\text{C}$  interactions (red dashed line).

**Table S1.** Crystallographic data and structure refinement for Ag<sub>14</sub>-dcbdt

| Ag <sub>14</sub> -dcbdt                               |                                                                                                   |
|-------------------------------------------------------|---------------------------------------------------------------------------------------------------|
| CCDC number                                           | 2400571                                                                                           |
| Empirical formula                                     | C <sub>216</sub> H <sub>180</sub> Ag <sub>14</sub> N <sub>12</sub> P <sub>8</sub> S <sub>12</sub> |
| Formula weight                                        | 5086.27                                                                                           |
| Temperature / K                                       | 200                                                                                               |
| Crystal system                                        | trigonal                                                                                          |
| Space group                                           | <i>R</i> -3                                                                                       |
| <i>a</i> / Å                                          | 20.6758(5)                                                                                        |
| <i>b</i> / Å                                          | 20.6758(5)                                                                                        |
| <i>c</i> / Å                                          | 44.3240(12)                                                                                       |
| $\alpha$ / °                                          | 90                                                                                                |
| $\beta$ / °                                           | 90                                                                                                |
| $\gamma$ / °                                          | 120                                                                                               |
| Volume / Å <sup>3</sup>                               | 164109.4(9)                                                                                       |
| Z                                                     | 3                                                                                                 |
| $\rho_{\text{calc}}$ g/cm <sup>3</sup>                | 1.544                                                                                             |
| $\mu$ / mm <sup>-1</sup>                              | 11.830                                                                                            |
| F(000)                                                | 7590.0                                                                                            |
| Crystal size/mm <sup>3</sup>                          | 0.050 × 0.050 × 0.050                                                                             |
| Radiation                                             | CuK $\alpha$ ( $\lambda$ = 1.54184)                                                               |
| 2 $\theta$ range for data collection / °              | 5.322 to 147.246                                                                                  |
| Index ranges                                          | -25 ≤ <i>h</i> ≤ 14, -24 ≤ <i>k</i> ≤ 22, -54 ≤ <i>l</i> ≤ 51                                     |
| Reflections collected                                 | 16452                                                                                             |
| Independent reflections                               | 7104 [ <i>R</i> <sub>int</sub> = 0.0275, <i>R</i> <sub>sigma</sub> = 0.0382]                      |
| Data/restraints/parameters                            | 7104/42/408                                                                                       |
| Goodness-of-fit on F <sup>2</sup>                     | 1.033                                                                                             |
| Final R indexes [ <i>I</i> ≥ 2 $\sigma$ ( <i>I</i> )] | <i>R</i> <sub>1</sub> = 0.0801, <i>wR</i> <sub>2</sub> = 0.2241                                   |
| Final R indexes [all data]                            | <i>R</i> <sub>1</sub> = 0.0972, <i>wR</i> <sub>2</sub> = 0.2374                                   |
| Largest diff. peak/hole / e Å <sup>-3</sup>           | 1.23/-0.91                                                                                        |

**Table S2.** Transition energy, oscillator strength, and orbital contributions of the strongest electronic excitations of Ag<sub>14</sub>-dcbdt.

| Wavelength (nm) | oscillator strength | Major orbital contributions (≥10%)   |
|-----------------|---------------------|--------------------------------------|
| 319.83          | 0.4613              | H-7 → L+8 (41.1%), H-8 → L+6 (15.6%) |
| 397.33          | 0.2038              | H-5 → L+4 (64.7%)                    |
| 426.31          | 0.0357              | H → L (68.7%)                        |

**Table S3.** The first singlet and triplet excited energies of the Ag<sub>14</sub>-dcbdt cluster in solution and gas state.

|                 | S <sub>1</sub> | T <sub>1</sub> | ΔE <sub>ST</sub> |
|-----------------|----------------|----------------|------------------|
| Dichloromethane | 2.9083 eV      | 2.4578 eV      | 0.4505 eV        |
| Gaseous state   | 2.9491 eV      | 2.5486 eV      | 0.3997 eV        |

## Supplementary References

1. D. Simão, H. Alves, D. Belo, S. Rabaça, E. Lopes, I. Santos, V. Gama, M. Duarte, R. Henriques, H. Novais and M. Almeida, *Eur. J. Inorg. Chem.*, 2001, 3119-3126.
2. CrysAlisPro 2012, Agilent Technologies. Version 1.171.36.31.
3. G. M. Sheldrick, *Acta Cryst. A* 2015, **71**, 3-8.
4. G. M. Sheldrick, *Acta Cryst. A* 2008, **64**, 112-122.
5. Dolomanov, O. V.; Bourhis, L. J.; Gildea, R. J.; Howard, J. A. K.; Puschmann, *H. J. Appl. Cryst.* 2009, **42**, 339-341.
6. M. J. Frisch, G. W. Trucks, H. B. Schlegel, G. E. Scuseria, M. A. Robb, J. R. Cheeseman, G. Scalmani, V. Barone, G. A. Petersson, H. Nakatsuji, X. Li, M. Caricato, A. V. Marenich, J. Bloino, B. G. Janesko, R. Gomperts, B. Mennucci, H. P. Hratchian, J. V. Ortiz, A. F. Izmaylov, J. L. Sonnenberg, Williams, F. Ding, F. Lipparini, F. Egidi, J. Goings, B. Peng, A. Petrone, T. Henderson, D. Ranasinghe, V. G. Zakrzewski, J. Gao, N. Rega, G. Zheng, W. Liang, M. Hada, M. Ehara, K. Toyota, R. Fukuda, J. Hasegawa, M. Ishida, T. Nakajima, Y. Honda, O. Kitao, H. Nakai, T. Vreven, K. Throssell, J. A. Montgomery Jr., J. E. Peralta, F. Ogliaro, M. J. Bearpark, J. J. Heyd, E. N. Brothers, K. N. Kudin, V. N. Staroverov, T. A. Keith, R. Kobayashi, J. Normand, K. Raghavachari, A. P. Rendell, J. C. Burant, S. S. Iyengar, J. Tomasi, M. Cossi, J. M. Millam, M. Klene, C. Adamo, R. Cammi, J. W. Ochterski, R. L. Martin, K. Morokuma, O. Farkas, J. B. Foresman and D. J. Fox, *Journal*, 2016.
7. J. P. Perdew, K. Burke, M. Ernzerhof, *Phys. Rev. Lett.* 1996, **77**, 3865-3868.
8. P. C. Hariharan, J. A. Pople, *Theoret. Chimica Acta* 1973, **28**, 213-222.
9. M. M. Francl, W. J. Pietro, W. J. Hehre, J. S. Binkley, M. S. Gordon, D. J. DeFrees, J. A. Pople, *J. Chem. Phys.* 1982, **77**, 3654-3665.
10. P. J. Hay, W. R. Wadt, *J. Chem. Phys.* 1985, **82**, 270-283.
11. P. J. Hay, W. R. Wadt, *J. Chem. Phys.* 1985, **82**, 284-298.
12. P. J. Hay, W. R. Wadt, *J. Chem. Phys.* 1985, **82**, 299-310.
